# Supplementary material for: High electrostrictive properties and energy storage performances with excellent thermal stability in Nb-doped Bi0.5Na0.5TiO3-based ceramics
Source: Royal Society of Chemistry journal article supplement (doi:10.1039/c9ra04069b), 2019-01-01
Supplement: c9ra04069b1.pdf [file c9ra04069b1.pdf]

PDF#40-0403: QM=Indexed(I); d=Guinier; I=Film/Visual  
Potassium Titanium Oxide  
K2 Ti6 O13  
Radiation=CuKa1 Lambda=1.5406 Filter=  
Calibration=Internal(SiO2) 2T=11.484-66.708 I/Ic(RIR)=  
Ref: Andersen, E., Andersen, I., Skou, E.  
Solid State Ionics, v27 p181 (1988)  
Monoclinic - Powder Diffraction, C2/m (12) Z=2 mp=  
CELL: 15.593 x 3.796 x 9.108 <90.0 x 99.78 x 90.0> P.S=mC42 (?)  
Density(c)=3.586 Density(m)=3.81A Mwt=573.59 Vol=531.28  
F(28)=19.6(.0108,132/0)  
Ref: Ibid.

Strong Lines: 7.70/X 3.05/X 1.90/X 6.40/7 3.69/7 2.98/7 2.96/7  
2.80/3 2.10/3 2.08/3  
NOTE: Prepared from reaction of K N O3 with Ti O2 (1:2).  
To replace 00-013-0574.

| 2-Theta | d(?)   | I(f)  | ( h k l )  | Theta  | 1/(2d) | 2pi/d  | n^2 |
|---------|--------|-------|------------|--------|--------|--------|-----|
| 11.484  | 7.6990 | 100.0 | ( 2 0 0 )  | 5.742  | 0.0649 | 0.8161 |     |
| 13.823  | 6.4010 | 67.0  | ( 2 0 -1 ) | 6.912  | 0.0781 | 0.9816 |     |
| 19.734  | 4.4950 | 13.0  | ( 0 0 2 )  | 9.867  | 0.1112 | 1.3978 |     |
| 24.111  | 3.6880 | 67.0  | ( 1 1 0 )  | 12.056 | 0.1356 | 1.7037 |     |
| 29.257  | 3.0500 | 100.0 | ( 3 1 0 )  | 14.629 | 0.1639 | 2.0601 |     |
| 29.940  | 2.9820 | 67.0  | ( 3 1 -1 ) | 14.970 | 0.1677 | 2.1070 |     |
| 30.126  | 2.9640 | 67.0  | ( 2 0 -3 ) | 15.063 | 0.1687 | 2.1198 |     |
| 30.753  | 2.9050 | 13.0  | ( 1 1 -2 ) | 15.376 | 0.1721 | 2.1629 |     |
| 31.913  | 2.8020 | 33.0  | ( 3 1 1 )  | 15.956 | 0.1784 | 2.2424 |     |
| 31.995  | 2.7950 | 33.0  | ( 1 1 2 )  | 15.997 | 0.1789 | 2.2480 |     |
| 33.770  | 2.6520 | 7.0   | ( 3 1 -2 ) | 16.885 | 0.1885 | 2.3692 |     |
| 34.728  | 2.5810 | 7.0   | ( 6 0 -1 ) | 17.364 | 0.1937 | 2.4344 |     |
| 43.058  | 2.0990 | 33.0  | ( 4 0 -4 ) | 21.529 | 0.2382 | 2.9934 |     |
| 43.516  | 2.0780 | 33.0  | ( 6 0 2 )  | 21.758 | 0.2406 | 3.0237 |     |
| 44.484  | 2.0350 | 7.0   | ( 3 1 3 )  | 22.242 | 0.2457 | 3.0876 |     |
| 45.305  | 2.0000 | 7.0   | ( 5 1 -3 ) | 22.652 | 0.2500 | 3.1416 |     |
| 47.887  | 1.8980 | 100.0 | ( 0 2 0 )  | 23.944 | 0.2634 | 3.3104 |     |
| 52.068  | 1.7550 | 7.0   | ( 5 1 -4 ) | 26.034 | 0.2849 | 3.5802 |     |
| 55.150  | 1.6640 | 7.0   | ( 7 1 2 )  | 27.575 | 0.3005 | 3.7760 |     |
| 57.636  | 1.5980 | 13.0  | ( 2 2 -3 ) | 28.818 | 0.3129 | 3.9319 |     |
| 58.846  | 1.5680 | 7.0   | ( 7 1 -4 ) | 29.423 | 0.3189 | 4.0071 |     |
| 59.471  | 1.5530 | 7.0   | ( 4 2 2 )  | 29.735 | 0.3220 | 4.0458 |     |
| 60.197  | 1.5360 | 7.0   | ( 5 1 -5 ) | 30.098 | 0.3255 | 4.0906 |     |
| 60.501  | 1.5290 | 7.0   | ( 6 2 -1 ) | 30.250 | 0.3270 | 4.1093 |     |
| 61.981  | 1.4960 | 7.0   | ( 0 0 6 )  | 30.990 | 0.3342 | 4.2000 |     |
| 65.494  | 1.4240 | 7.0   | ( 2 0 6 )  | 32.747 | 0.3511 | 4.4123 |     |
| 66.333  | 1.4080 | 7.0   | ( 4 2 -4 ) | 33.166 | 0.3551 | 4.4625 |     |
| 66.708  | 1.4010 | 7.0   | ( 6 2 2 )  | 33.354 | 0.3569 | 4.4848 |     |
