# Supplementary material for: High electrostrictive properties and energy storage performances with excellent thermal stability in Nb-doped Bi0.5Na0.5TiO3-based ceramics
Source: Royal Society of Chemistry journal article supplement (doi:10.1039/c9ra04069b), 2019-01-01
Supplement: c9ra04069b2.pdf [file c9ra04069b2.pdf]

## Supporting information

### High electrostrictive properties and energy storage performances with excellent thermal stability in Nb-doped $\text{Bi}_{0.5}\text{Na}_{0.5}\text{TiO}_3$ -based ceramics

Yichen Wu <sup>a,b</sup>, Genshui Wang <sup>b,c,d,\*</sup>, Zheng Jiao <sup>a</sup>, Yuzhu Fan <sup>b</sup>, Ping Peng <sup>b</sup> and Xianlin Dong <sup>b,c</sup>

<sup>a</sup> School of Environmental and Chemical Engineering, *Shanghai University, Shanghai 200444, China*

<sup>b</sup> *Key Laboratory of Inorganic Functional Materials and Devices, Shanghai Institute of Ceramics, Chinese Academy of Sciences, Shanghai 200050, China*

<sup>c</sup> *The State Key Lab of High Performance Ceramics and Superfine Microstructure Shanghai Institute of Ceramics, Chinese Academy of Sciences, Shanghai 200050, China*

<sup>d</sup> *Center of Materials Science and Optoelectronics Engineering, University of Chinese Academy of Sciences, Beijing 100049, China*

Corresponding author: [genshuiwang@mail.sic.ac.cn](mailto:genshuiwang@mail.sic.ac.cn)

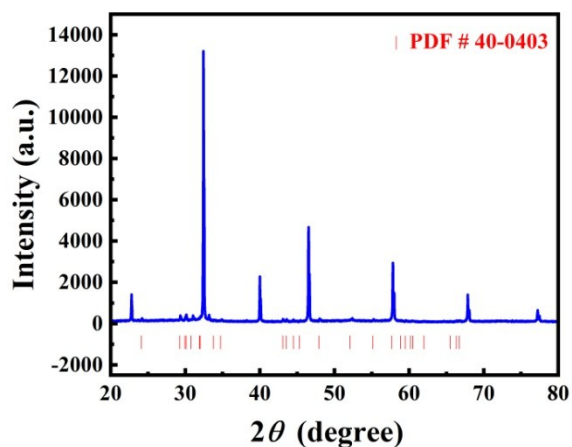

**Fig. S1:** The XRD spectrum of the  $x=0.07$  ceramics with the secondary phase indexed as  $K_2Ti_6O_{13}$  (PDF#40-0403).

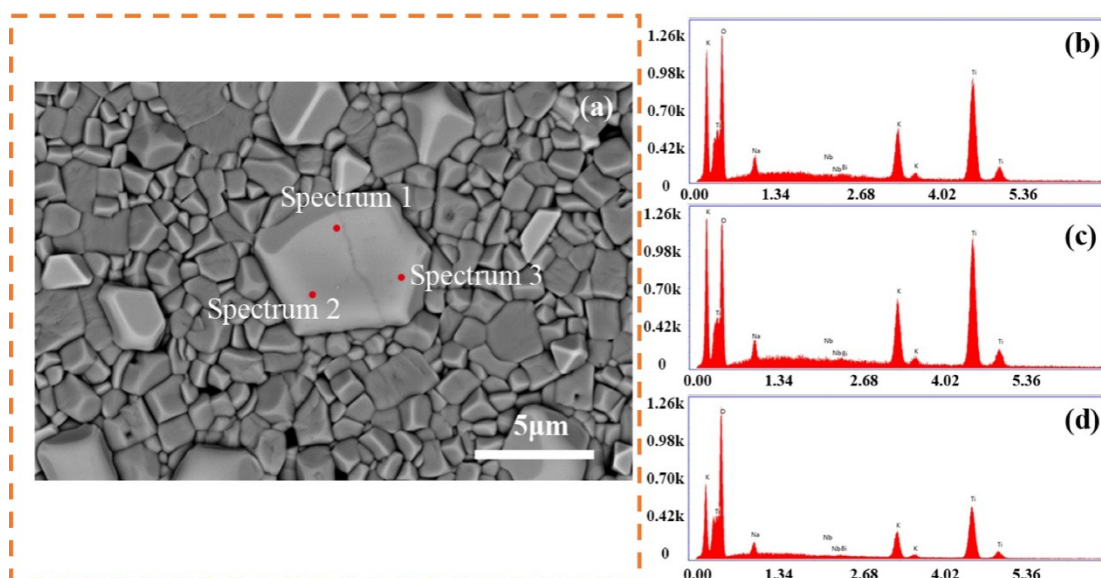

**Fig. S2:** (a) The surface micrograph of  $x=0.07$  ceramic. (b)–(d) The corresponding spot scanning results of the  $x=0.07$  ceramic

**Table. S1** The EDS spot scanning results of the  $x=0.07$  ceramics from the Fig. S2

| Element | Spectrum 1 | Spectrum 2 | Spectrum 3 |
|---------|------------|------------|------------|
| Na      | 0.99       | 0.89       | 1.37       |
| Nb      | 0.13       | 0.17       | 0.05       |
| Bi      | 0.11       | 0.11       | 0.06       |
| K       | 8.01       | 8.09       | 7.92       |
| Ti      | 28.58      | 28.54      | 28.57      |
| O       | 62.18      | 62.20      | 62.03      |
| Sum     | 100        | 100        | 100        |
